# Supplementary material for: Single-cell analyses of polyclonal Plasmodium vivax infections and their consequences on parasite transmission
Source: PubMed Central journal article supplement — Nat Commun. 2024 Sep 2;15:7625. doi: 10.1038/s41467-024-51949-8 (PMC11369214; doi:10.1038/s41467-024-51949-8), 2024-09-02
Supplement: 41467_2024_51949_MOESM3_ESM.pdf [file 41467_2024_51949_MOESM3_ESM.pdf]

## **Description of Additional Supplementary Files**

**Title: Supplemental Data 1**

**Description:** Sequencing summary statistics for all samples.

**Title: Supplemental Data 2**

**Description:** Lists of genes deleted in NIH-1993-F3 and Chesson.

**Title: Supplemental Data 3**

**Description:** Summary of the differential gene expression analyses.
